# Supplementary material for: Genetic Diversity and Phylogeography of a Turf-Forming Cosmopolitan Marine Alga, Gelidium crinale (Gelidiales, Rhodo-Phyta)
Source: MDPI journal article supplement (doi:10.3390/ijms24065263), 2023-03-09
Supplement: s1 [file s1]

**Supplementary Table S6.** List of published sequences for molecular analyses.

| Species                    | Voucher-code        | Collection site                                              |
|----------------------------|---------------------|--------------------------------------------------------------|
| <i>Gelidium americanum</i> | SP469081            | Pedra do Sal, Luis Correia, Piauí, Brazil                    |
| <i>Gelidium calidum</i>    | SP469077            | Jauá Beach, Camaçari, Bahia, Brazil                          |
| <i>Gelidium crinale</i>    | CNU056305           | Gordon's Bay, Sydney, NSW, Australia                         |
| <i>Gelidium crinale</i>    | LHI-1               | Old Gulch, Lord Howe Island, NSW, Australia                  |
| <i>Gelidium crinale</i>    | NSW-7               | Summer Cloud Bay, Jervis Bay, NSW, Australia                 |
| <i>Gelidium crinale</i>    | -                   | Fish Hook Bay, Rottnest Island, WA, Australia                |
| <i>Gelidium crinale</i>    | -                   | Fish Hook Bay, Rottnest Island, WA, Australia                |
| <i>Gelidium crinale</i>    | WA09                | Green Island, Rottnest Island, WA, Australia                 |
| <i>Gelidium crinale</i>    | WA12                | Green Island, Rottnest Island, WA, Australia                 |
| <i>Gelidium crinale</i>    | IBT0204             | Brava Beach, Ubatuba, Sao Paulo, Brazil                      |
| <i>Gelidium crinale</i>    | IBT0207             | Brava Beach, Ubatuba, Sao Paulo, Brazil                      |
| <i>Gelidium crinale</i>    | IBT0194             | Brava Beach, Ubatuba, Sao Paulo, Brazil                      |
| <i>Gelidium crinale</i>    | IBT0114             | Saco da Ribeira, Ubatuba, Sao Paulo, Brazil                  |
| <i>Gelidium crinale</i>    | IBT0109             | Saco da Ribeira, Ubatuba, Sao Paulo, Brazil                  |
| <i>Gelidium crinale</i>    | IBT0233             | Domingas Dias Beach, Ubatuba, Sao Paulo, Brazil              |
| <i>Gelidium crinale</i>    | IBT0373             | Cambriú Beach, Cardoso Island, Sao Paulo, Brazil             |
| <i>Gelidium crinale</i>    | IBT0273             | Cibratel Beach, Itanhaém, Sao Paulo, Brazil                  |
| <i>Gelidium crinale</i>    | IBT0362             | Cibratel Beach, Itanhaém, Sao Paulo, Brazil                  |
| <i>Gelidium crinale</i>    | IBT0272             | Sonho Beach, Itanhaém, Sao Paulo, Brazil                     |
| <i>Gelidium crinale</i>    | IBT0251             | Éden Beach, Guarujá, Sao Paulo, Brazil                       |
| <i>Gelidium crinale</i>    | IBT0250             | Éden Beach, Guarujá, Sao Paulo, Brazil                       |
| <i>Gelidium crinale</i>    | IBC0586             | Enseada Azul, Meaípe, Espirito Santo, Brazil                 |
| <i>Gelidium crinale</i>    | IBT0674             | Manguinhos, Manguinhos, Espirito Santo, Brazil               |
| <i>Gelidium crinale</i>    | IBC0560             | Parati Beach, Anchieta, Espirito Santo, Brazil               |
| <i>Gelidium crinale</i>    | IBC0559             | Parati Beach, Anchieta, Espirito Santo, Brazil               |
| <i>Gelidium crinale</i>    | SP469067            | Encantadas, Ilha do Mel, PR, Brazil                          |
| <i>Gelidium crinale</i>    | SP469065            | Espelho Beach, Porto Seguro, BA, Brazil                      |
| <i>Gelidium crinale</i>    | SP469064            | Aracaju, Barra dos Coqueiros, SE, Brazil                     |
| <i>Gelidium crinale</i>    | SP469061            | Munguba Beach, Paracuru, CE, Brazil                          |
| <i>Gelidium crinale</i>    | IBT0903             | Pai Vitório Beach, Armação de Búzios, Rio de Janeiro, Brazil |
| <i>Gelidium crinale</i>    | SP469062            | Rio do Fogo Beach, Maxaranguape, Rio Grande do Norte, Brazil |
| <i>Gelidium crinale</i>    | IBT0276             | Rio do Fogo Beach, Rio do Fogo, Rio Grande do Norte, Brazil  |
| <i>Gelidium crinale</i>    | EIS-023 (CNU065686) | La Perousse, Easter Island, Valparaiso, Chile                |
| <i>Gelidium crinale</i>    | CNU000179           | Donghai road, Qingdao, China                                 |
| <i>Gelidium crinale</i>    | CNU000181           | Donghai road, Qingdao, China                                 |
| <i>Gelidium crinale</i>    | P1575               | Hainan, China                                                |
| <i>Gelidium crinale</i>    | P1576               | Hainan, China                                                |
| <i>Gelidium crinale</i>    | CNU010865           | Oriental Hotel, Yantai, China                                |
| <i>Gelidium crinale</i>    | CNU065270           | Putuoshan, Shanghai, China                                   |
| <i>Gelidium crinale</i>    | CNU065270-1         | Putuoshan, Shanghai, China                                   |
| <i>Gelidium crinale</i>    | PC0171059 (LLG2997) | Lampaul île Ségat, Finistère, Brittany, France               |
| <i>Gelidium crinale</i>    | GHB0484             | Fort Miradou, Collioure, Occitanie, France                   |
| <i>Gelidium crinale</i>    | GHB0485             | Fort Miradou, Collioure, Occitanie, France                   |
| <i>Gelidium crinale</i>    | GHB0486-1           | Fort Miradou, Collioure, Occitanie, France                   |
| <i>Gelidium crinale</i>    | GHB0492             | Fort Miradou, Collioure, Occitanie, France                   |
| <i>Gelidium crinale</i>    | GHB0256             | Ile Verte, Roscoff, Brittany, France                         |
| <i>Gelidium crinale</i>    | GHB0260             | Ile Verte, Roscoff, Brittany, France                         |
| <i>Gelidium crinale</i>    | GHB0261             | Ile Verte, Roscoff, Brittany, France                         |
| <i>Gelidium crinale</i>    | GHB0265             | Ile Verte, Roscoff, Brittany, France                         |
| <i>Gelidium crinale</i>    | GHB0266             | Ile Verte, Roscoff, Brittany, France                         |
| <i>Gelidium crinale</i>    | GHB0269             | Ile Verte, Roscoff, Brittany, France                         |

|                         |                     |                                                      |
|-------------------------|---------------------|------------------------------------------------------|
| <i>Gelidium crinale</i> | GHB0273             | Ile Verte, Roscoff, Brittany, France                 |
| <i>Gelidium crinale</i> | GHB0337             | Pointe de Perharidy, Roscoff, Brittany, France       |
| <i>Gelidium crinale</i> | GHB0355             | Pointe de Perharidy, Roscoff, Brittany, France       |
| <i>Gelidium crinale</i> | GHB0357             | Pointe de Perharidy, Roscoff, Brittany, France       |
| <i>Gelidium crinale</i> | Hongkong21          | Seoko, Hong Kong                                     |
| <i>Gelidium crinale</i> | G2707               | Seoko, Hong Kong                                     |
| <i>Gelidium crinale</i> | G2710               | Seoko, Hong Kong                                     |
| <i>Gelidium crinale</i> | Battelli3           | Koper Bay, Slovenia                                  |
| <i>Gelidium crinale</i> | Battelli7           | Koper Bay, Slovenia                                  |
| <i>Gelidium crinale</i> | Battelli10          | Koper Bay, Slovenia                                  |
| <i>Gelidium crinale</i> | BACI6313            | Cala Incina, Italy                                   |
| <i>Gelidium crinale</i> | BACO1194            | Cozze loc., Calarena, Bari, Italy                    |
| <i>Gelidium crinale</i> | BACO874             | Cozze loc., Calarena, Bari, Italy                    |
| <i>Gelidium crinale</i> | BACO1195            | Cozze loc., Calarena, Bari, Italy                    |
| <i>Gelidium crinale</i> | BALF12101           | Lido S. Francesco, Bari, Italy                       |
| <i>Gelidium crinale</i> | BALF12102           | Lido S. Francesco, Bari, Italy                       |
| <i>Gelidium crinale</i> | FGVA23104           | Lago de Varano loc., Contrada Chianca, Foggia, Italy |
| <i>Gelidium crinale</i> | FGVA23105           | Lago de Varano loc., Contrada Chianca, Foggia, Italy |
| <i>Gelidium crinale</i> | FGVA23101           | Lago de Varano loc., Crocifisso, Foggia, Italy       |
| <i>Gelidium crinale</i> | FGVA23102           | Lago di Varano loc., Crocifisso, Foggia, Italy       |
| <i>Gelidium crinale</i> | FGVA23103           | Lago di Varano loc., Crocifisso, Foggia, Italy       |
| <i>Gelidium crinale</i> | BACP25213           | Punta della Contessa, Italy                          |
| <i>Gelidium crinale</i> | ATVA 01 R1          | Varano, Ancona, Italy                                |
| <i>Gelidium crinale</i> | TABAT1012           | Battendieri, Taranto, Italy                          |
| <i>Gelidium crinale</i> | TACI10121           | Cimino, Taranto, Italy                               |
| <i>Gelidium crinale</i> | TACI6102            | Mar Piccolo loc. Cimino, Taranto, Italy              |
| <i>Gelidium crinale</i> | TACI6101            | Mar Piccolo loc., Cimino, Taranto, Italy             |
| <i>Gelidium crinale</i> | -                   | Awaji Island, Hyogo Prefecture, Japan                |
| <i>Gelidium crinale</i> | CNU063322           | Awase, Okinawa, Japan                                |
| <i>Gelidium crinale</i> | CNU009062           | Dugok, Namhaegun, Korea                              |
| <i>Gelidium crinale</i> | CNU009063           | Dugok, Namhaegun, Korea                              |
| <i>Gelidium crinale</i> | CNU009065           | Dugok, Namhaegun, Korea                              |
| <i>Gelidium crinale</i> | CNU000123           | Jeoncheon, Donghae, Korea                            |
| <i>Gelidium crinale</i> | 210233              | Jumunjin, Gangneung, Korea                           |
| <i>Gelidium crinale</i> | G2656               | Muchangpo, Boryeong, Korea                           |
| <i>Gelidium crinale</i> | CNU068531           | Tonggumi, Ulleungdo, Korea                           |
| <i>Gelidium crinale</i> | CNU068531-1         | Tonggumi, Ulleungdo, Korea                           |
| <i>Gelidium crinale</i> | CNU058980           | Myeongsasipri, Wando, Korea                          |
| <i>Gelidium crinale</i> | CNU058992           | Myeongsasipri, Wando, Korea                          |
| <i>Gelidium crinale</i> | CNU063472-1         | Myeongsasipri, Wando, Korea                          |
| <i>Gelidium crinale</i> | CNU081484           | Geumgap, Jindo, Korea                                |
| <i>Gelidium crinale</i> | CNU081485           | Geumgap, Jindo, Korea                                |
| <i>Gelidium crinale</i> | G6131               | Bumseom, Jeju, Korea                                 |
| <i>Gelidium crinale</i> | G6135               | Bumseom, Jeju, Korea                                 |
| <i>Gelidium crinale</i> | G3923               | Pyeongdae, Jeju, Korea                               |
| <i>Gelidium crinale</i> | ASB123              | Northland, North Island, New Zealand                 |
| <i>Gelidium crinale</i> | ASD265              | Tapeka Point, North Island, New Zealand              |
| <i>Gelidium crinale</i> | PR                  | Playa Esperanza, Manati, Puerto Rico                 |
| <i>Gelidium crinale</i> | CNU031021           | Sentosa Island, Singapore                            |
| <i>Gelidium crinale</i> | SANT-Algae 28095    | A Toxa, Pontevedra, Spain                            |
| <i>Gelidium crinale</i> | PC0165830 (LLG5929) | Agiti Bidea, Euskadi, Basque Country, Spain          |
| <i>Gelidium crinale</i> | -                   | Aramar, Asturias, Spain                              |
| <i>Gelidium crinale</i> | -                   | Aramar, Asturias, Spain                              |

|                                 |                  |                                                                        |
|---------------------------------|------------------|------------------------------------------------------------------------|
| <i>Gelidium crinale</i>         | -                | La Arana, Malaga, Spain                                                |
| <i>Gelidium crinale</i>         | SANT-Algae 25618 | La Franca, Asturias, Spain                                             |
| <i>Gelidium crinale</i>         | -                | La Garita, Canary Island, Spain                                        |
| <i>Gelidium crinale</i>         | SANT-Algae 24719 | Perbes, A Corunha, Spain                                               |
| <i>Gelidium crinale</i>         | SANT-Algae 24631 | Playa de Langre, Cantabria, Spain                                      |
| <i>Gelidium crinale</i>         | SANT-Algae 26556 | Punta Plata, Cadiz, Spain                                              |
| <i>Gelidium crinale</i>         | G6359            | Tarifa, Cadiz, Spain                                                   |
| <i>Gelidium crinale</i>         | SANT-Algae 25147 | Zumaia, Guipuzcoa, Spain                                               |
| <i>Gelidium crinale</i>         | ODC605           | Kunduchi, Tanzania                                                     |
| <i>Gelidium crinale</i>         | -                | Ilfracombe, Devon, UK                                                  |
| <i>Gelidium crinale</i>         | G6292            | Sidmouth, Devon, UK                                                    |
| <i>Gelidium crinale</i>         | biNC             | Beaufort Inlet, North Carolina, USA                                    |
| <i>Gelidium crinale</i>         | bsNC             | Bogue Sound, North Carolina, USA                                       |
| <i>Gelidium crinale</i>         | ffNC             | Fort Fisher, North Carolina, USA                                       |
| <i>Gelidium crinale</i>         | miNC             | Masonboro Inlet, North Carolina, USA                                   |
| <i>Gelidium crinale</i>         | riNC             | Radio Island, North Carolina, USA                                      |
| <i>Gelidium crinale</i>         | GamerNC2         | Stump Sound, North Carolina, USA                                       |
| <i>Gelidium crinale</i>         | -                | Port Aransas, Texas, USA                                               |
| <i>Gelidium crinale</i>         | LB2321           | Port Aransas, Texas, USA                                               |
| <i>Gelidium crinale</i>         | -                | Marineland, Florida, USA                                               |
| <i>Gelidium crinale</i>         | CNU080561        | Nam O, Da Nang, Vietnam                                                |
| <i>Gelidium crinale</i>         | CNU080561-2      | Nam O, Da Nang, Vietnam                                                |
| <i>Gelidium crinale</i>         | CNU080562        | Nam O, Da Nang, Vietnam                                                |
| <i>Gelidium crinale</i>         | CNU081040        | Nam O, Da Nang, Vietnam                                                |
| <i>Gelidium crinale</i>         | CNU081039        | Nam O, Da Nang, Vietnam                                                |
| <i>Gelidium crinale</i>         | CNU081039-1      | Nam O, Da Nang, Vietnam                                                |
| <i>Pterocladia heteroplotos</i> | PC0452740        | Malabar Hill, Bombay, India (cotype of <i>Gelidium heteroplotos</i> )  |
| <i>Pterocladia heteroplotos</i> | LNR-50330        | Malabar Hill, Bombay, India (type <i>Gelidium heteroplotos</i> ; 5275) |

---

Dash (-) indicates not applicable.

[illegible]

|            |            |            |     |          |          |
|------------|------------|------------|-----|----------|----------|
| 2019.04.17 | 48.728624  | -3.987586  | C1  | new      | -        |
| 2019.04.19 | 48.727303  | -4.010466  | C1  | new      | -        |
| 2019.04.19 | 48.727303  | -4.010466  | C1  | new      | -        |
| 2019.04.19 | 48.727303  | -4.010466  | C1  | new      | -        |
| 2008.04.23 | 22.232961  | 114.252579 | C23 | JX096532 | -        |
| 2008.04.23 | 22.232961  | 114.252579 | C23 | JX096533 | JX096514 |
| 2008.04.23 | 22.232961  | 114.252579 | C23 | JX096534 | JX096515 |
| -          | 45.544492  | 13.719717  | C15 | new      | -        |
| -          | 45.544492  | 13.719717  | C4  | new      | -        |
| -          | 45.544492  | 13.719717  | C1  | new      | -        |
| -          | 40.987453  | 17.25807   | C4  | new      | -        |
| 2011.09.11 | 41.040142  | 17.137278  | C16 | new      | -        |
| 2012.07.08 | 41.040142  | 17.137278  | C15 | new      | -        |
| 2011.09.11 | 41.040142  | 17.137278  | C17 | KU958465 | -        |
| 2011.10.12 | 41.137126  | 16.833893  | C17 | KU958466 | -        |
| 2011.10.12 | 41.137126  | 16.833893  | C17 | new      | -        |
| 2011.10.23 | 41.921243  | 15.74936   | C17 | new      | -        |
| 2011.10.23 | 41.921243  | 15.74936   | C17 | new      | new      |
| 2011.10.23 | 41.921243  | 15.74936   | C15 | KU958467 | KU958473 |
| 2011.10.23 | 41.921243  | 15.74936   | C15 | new      | -        |
| 2011.10.23 | 41.921243  | 15.74936   | C17 | new      | -        |
| -          | 40.613191  | 18.026267  | C15 | new      | -        |
| -          | 43.608817  | 13.480131  | C15 | new      | -        |
| 2012.10.04 | 40.494549  | 17.324101  | C15 | new      | -        |
| 2012.10.04 | 40.470094  | 17.298926  | C18 | new      | -        |
| 2011.10.06 | 40.484638  | 17.282861  | C18 | new      | -        |
| 2011.10.06 | 40.484638  | 17.282861  | C18 | KU958468 | KU958474 |
| 1996.10.01 | 34.436043  | 134.918617 | -   | -        | AB017679 |
| 2014.09.20 | 26.314546  | 127.836874 | C25 | new      | -        |
| 2010       | 34.768067  | 127.907885 | C22 | JX096536 | -        |
| 2010       | 34.768067  | 127.907885 | C22 | JX096537 | -        |
| 2010       | 34.768067  | 127.907885 | C22 | JX096538 | -        |
| 2010.11.25 | 37.481933  | 129.158086 | C21 | JX096539 | JX096518 |
| -          | 37.89443   | 128.834369 | C19 | new      | -        |
| 2007.07.29 | 36.240731  | 126.529042 | C19 | HM629863 | HM629823 |
| 2015.08.06 | 37.466227  | 130.835651 | C19 | new      | -        |
| 2015.08.06 | 37.466227  | 130.835651 | C19 | new      | -        |
| 2014.07.13 | 34.323063  | 126.83297  | C20 | new      | -        |
| 2014.07.13 | 34.323063  | 126.83297  | C20 | new      | -        |
| 2014.10.24 | 34.323063  | 126.83297  | C20 | new      | -        |
| 2020.08.29 | 34.394401  | 126.277906 | C19 | new      |          |
| 2020.08.29 | 34.394401  | 126.277906 | C19 | new      |          |
| 2009.07.05 | 33.216005  | 126.518644 | C19 | JX096535 | JX096517 |
| 2009.08.23 | 33.216005  | 126.518644 | -   | -        | JX096516 |
| 2010.05.29 | 33.534076  | 126.841135 | C19 | JX096540 | -        |
| 2001.05.07 | -35.2533   | 174.133    | -   | -        | AY648021 |
| 2003.10.29 | -35.245053 | 174.118415 | C28 | KF381378 | KF381387 |
| -          | 18.484897  | -66.525684 | C14 | HQ412463 | U00983   |
| 2012.10.14 | 1.247296   | 103.823797 | C27 | new      | -        |
| 2013.04.24 | 42.487686  | -8.845649  | C1  | KJ179937 | -        |
| 2018.06.24 | 43.309254  | -2.071842  | C1  | new      | -        |
| -          | 43.611892  | -5.782661  | -   | -        | AF308791 |
| -          | 43.611892  | -5.782661  | -   | -        | AF308792 |

|            |           |            |     |            |            |
|------------|-----------|------------|-----|------------|------------|
| -          | 36.712244 | -4.321741  | -   | -          | AF308789   |
| 2011.03.23 | 43.394159 | -4.571691  | C1  | KJ179935   | -          |
| -          | 28.007096 | -15.376164 | -   | -          | AF308793   |
| 2011.01.20 | 43.375864 | -8.215395  | C1  | KJ179932   | -          |
| 2010.11.06 | 43.477    | -3.694     | C1  | KJ168044   | -          |
| 2011.02.19 | 36.531407 | -6.306373  | C3  | KJ179933   | -          |
| 2010.04.12 | 36.009548 | -5.609565  | C3  | JX096541   | JX096519   |
| 2011.03.18 | 43.299714 | -2.261365  | C2  | KJ179934   | -          |
| 1997.07.10 | -6.658452 | 39.218958  | C32 | <b>new</b> | <b>new</b> |
| -          | 51.209646 | -4129078   | -   | -          | AF308786   |
| 2010.04.04 | 50.677281 | -3.237448  | C1  | JX096542   | JX096520   |
| -          | 34.694337 | -76.667863 | C7  | HQ412458   | AF308795   |
| 1991.02.16 | 34.708425 | -76.858863 | C9  | HQ412460   | HQ412489   |
| 1991.05.14 | 33.970834 | -77.916451 | C6  | HQ412461   | HQ412490   |
| -          | 34.180209 | -77.803362 | C6  | HQ412457   | U00981     |
| 1991.02.16 | 34.713631 | -76.680296 | C6  | HQ412459   | HQ412488   |
| 2003.07.11 | 34.482858 | -77.435761 | C8  | HQ412462   | HQ412491   |
| -          | 27.83319  | -97.03972  | -   | -          | U00982     |
| -          | 27.83319  | -97.03972  | C5  | JX096543   | JX096521   |
| -          | 29.669075 | -81.212201 | -   | -          | AF308794   |
| 2018.05.17 | 16.119194 | 108.130703 | C25 | <b>new</b> | -          |
| 2018.05.17 | 16.119194 | 108.130703 | C25 | <b>new</b> | -          |
| 2018.05.17 | 16.119194 | 108.130703 | C25 | <b>new</b> | -          |
| 2019.02.25 | 16.119194 | 108.130703 | C25 | <b>new</b> | <b>new</b> |
| 2019.02.25 | 16.119194 | 108.130703 | C25 | <b>new</b> | -          |
| 2019.02.25 | 16.119194 | 108.130703 | C25 | <b>new</b> | -          |
| 1927       | 18.940958 | 72.795203  | C33 | <b>new</b> | <b>new</b> |
| 1927       | 18.940958 | 72.795203  | -   | -          | <b>new</b> |
