# Supplementary material for: Genetic Diversity and Phylogeography of a Turf-Forming Cosmopolitan Marine Alga, Gelidium crinale (Gelidiales, Rhodo-Phyta)
Source: MDPI journal article supplement (doi:10.3390/ijms24065263), 2023-03-09
Supplement: s1 [file s1]

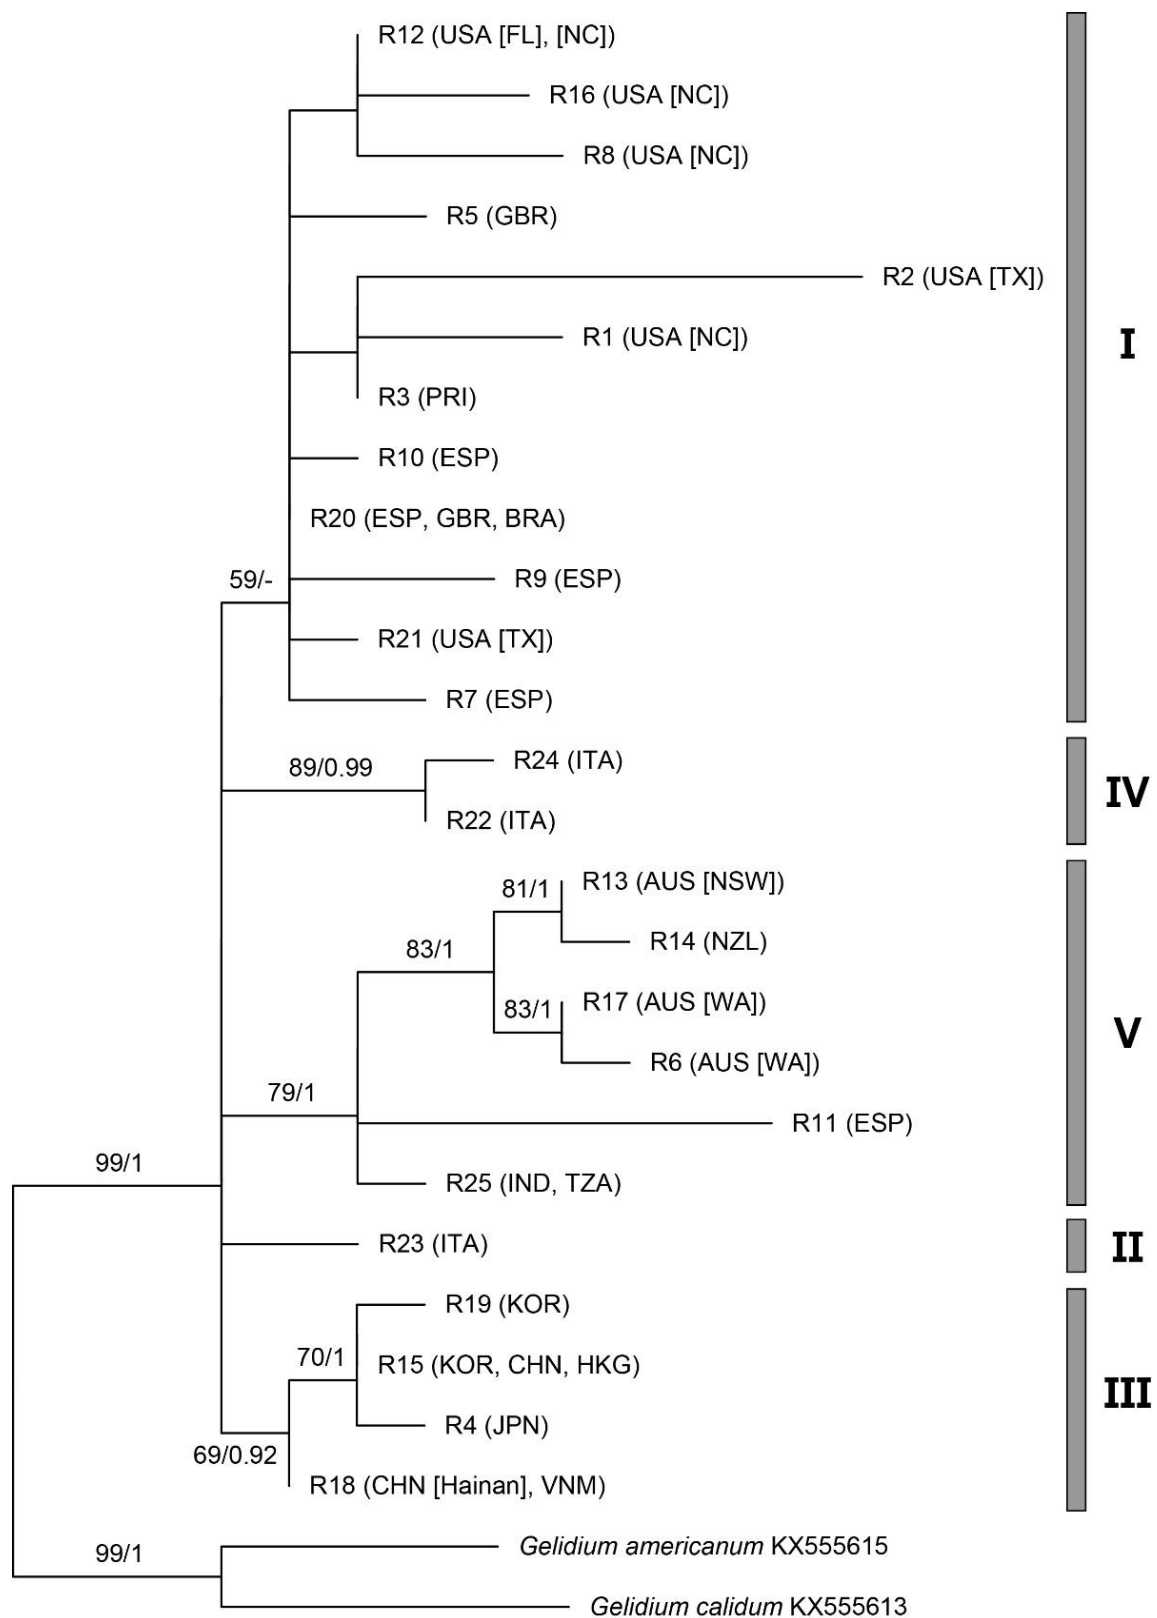

**Figure S1.** Maximum likelihood (ML) phylogeny of *Gelidium crinale* using plastid *rbcL* sequences. ML bootstrap values ( $\geq 50\%$ ) and Bayesian posterior probabilities ( $\geq 0.9$ ) are shown at branches. Dash indicates values  $< 50$  or  $< 0.9$ .

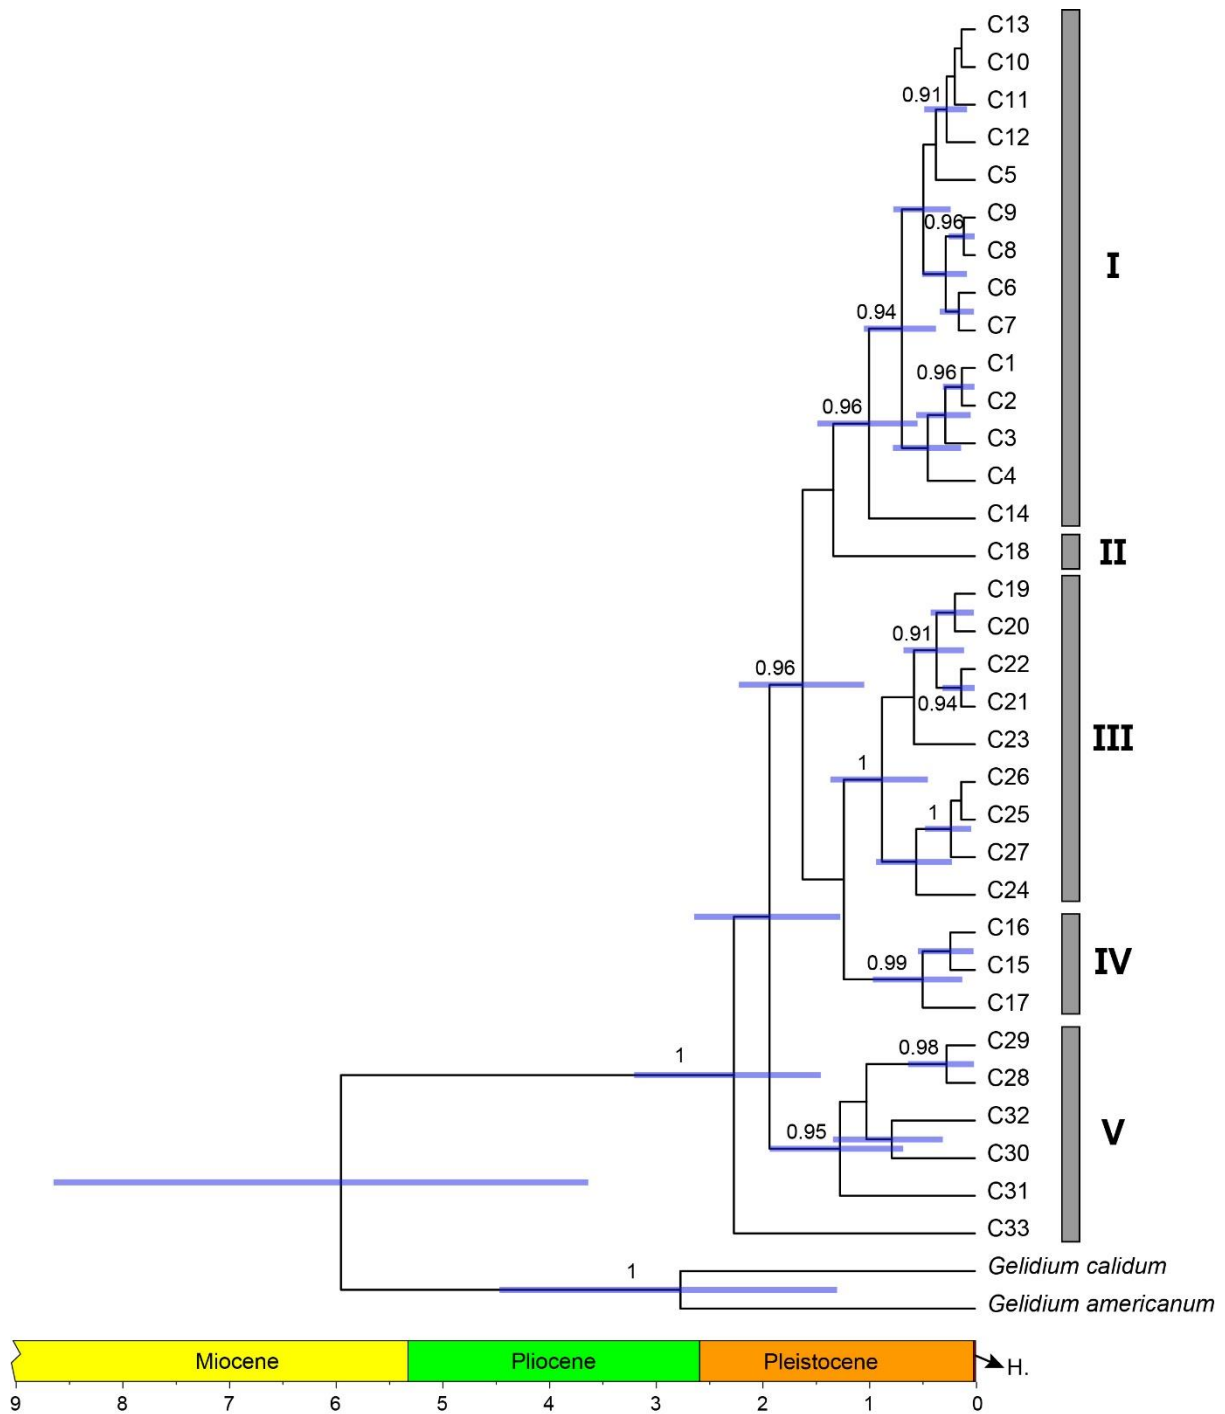

**Figure S2.** Time-calibrated phylogeny of *Gelidium crinale* based on COI-5P haplotypes. The time scale is printed in Ma. Blue bars represent 95% highest posterior density intervals. Numbers above or below branches are posterior probabilities ( $\geq 0.9$  are shown).

**Supplementary Table S1.** Comparison of partial *rbcL* sequences (124 bp) at which base-pair variation occurred between *Gelidium crinale* and *Pterocladia heteroplotos* including two outgroups (*G. americanum* and *G. calidum*).

|                                                                  | 13 | 16 | 32 | 106 | 118 | 124 |
|------------------------------------------------------------------|----|----|----|-----|-----|-----|
| <i>Gelidium crinale</i> -Group I (UK)                            | A  | A  | G  | C   | C   | G   |
| <i>G. crinale</i> -Group II (Italy)                              | •  | •  | •  | •   | T   | •   |
| <i>G. crinale</i> -Group III (Korea)                             | •  | •  | •  | •   | T   | •   |
| <i>G. crinale</i> -Group IV (Italy)                              | •  | •  | •  | •   | T   | •   |
| <i>G. crinale</i> -Group V (Western Australia)                   | •  | •  | •  | •   | T   | T   |
| <i>G. crinale</i> -Group V (New Zealand)                         | •  | •  | •  | •   | T   | T   |
| <i>G. crinale</i> -Group V (Spain)                               | •  | •  | •  | •   | T   | T   |
| <i>G. crinale</i> -Group V (Tanzania)                            | •  | •  | •  | •   | T   | T   |
| <i>Pterocladia heteroplotos</i> (holotype, <i>Børgesen</i> 5275) | •  | •  | •  | •   | T   | T   |
| <i>Pterocladia heteroplotos</i> (co-type, PC 0452740)            | •  | •  | •  | •   | T   | T   |
| <i>Gelidium americanum</i>                                       | •  | •  | A  | T   | T   | •   |
| <i>Gelidium calidum</i>                                          | G  | G  | A  | •   | T   | •   |

**Supplementary Table S2.** Pairwise divergence comparison of mitochondrial COI-5P and plastid *rbcL* sequences between five groups.

|            | 1                                         | 2       | 3                   | 4               | 5                   |
|------------|-------------------------------------------|---------|---------------------|-----------------|---------------------|
| 1. Group 1 | COI-5P: 0.2-1.6<br><i>rbcL</i> : 0.08-1.1 | 0.2-0.9 | 0.2-1.0             | 0.3-1.1         | 0.3-1.4             |
| 2. Group 2 | 1.6-2.4                                   | na      | 0.2-0.4             | 0.4-0.5         | 0.4-0.8             |
| 3. Group 3 | 1.4-2.6                                   | 1.8-2.2 | 0.2-1.6<br>0.08-0.2 | 0.3-0.6         | 0.3-0.9             |
| 4. Group 4 | 1.0-2.0                                   | 1.4-1.6 | 0.8-2.0             | 0.2-0.6<br>0.08 | 0.5-1.0             |
| 5. Group 5 | 1.4-3.6                                   | 1.8-3.0 | 1.0-3.2             | 0.8-2.8         | 0.2-3.0<br>0.08-0.8 |

**Supplementary Table S3.** Estimates of average gene diversity within populations ( $H_s$ ), total gene diversity ( $H_T$ ), interpopulation differentiation ( $G_{ST}$ ) and number of substitution types ( $N_{ST}$ ) for mitochondrial COI-5P haplotypes of *Gelidium crinale*.

|                  | $H_s$         | $V_s$         | $H_T$         | $V_T$         | $G_{ST}$      | $N_{ST}$        |
|------------------|---------------|---------------|---------------|---------------|---------------|-----------------|
| Population-level | 0.535 (0.110) | 0.274 (0.097) | 0.978 (0.027) | 1.000 (0.085) | 0.453 (0.113) | 0.726 (0.098)** |
| Phylogroups      | 0.632 (0.166) | 0.473 (0.138) | 1.000 (0.063) | 1.038 (0.142) | 0.368 (0.170) | 0.544 (0.119)*  |
| Realms           | 0.772 (0.035) | 0.467 (0.116) | 1.000 (0.024) | 1.094 (0.030) | 0.228 (0.039) | 0.573 (0.148)** |

Parentheses indicates standard error. \*  $p < 0.05$ , \*\*  $p < 0.01$ .

**Supplementary Table S4.** Pairwise  $F_{ST}$  comparison between six realms of *G. crinale*.

|                         | 1             | 2             | 3             | 4             | 5       | 6 |
|-------------------------|---------------|---------------|---------------|---------------|---------|---|
| 1. Eastern Atlantic     | –             |               |               |               |         |   |
| 2. Western Atlantic     | <b>0.4676</b> | –             |               |               |         |   |
| 3. Asia                 | <b>0.5353</b> | <b>0.7621</b> | –             |               |         |   |
| 4. Temperate Australia  | <b>0.5180</b> | <b>0.8273</b> | <b>0.5758</b> | –             |         |   |
| 5. Western Indo-Pacific | <b>0.5900</b> | <b>0.8247</b> | <b>0.6366</b> | <b>0.4356</b> | –       |   |
| 6. Eastern Indo-Pacific | 0.6153        | 0.8656        | 0.6972        | 0.6410        | -0.1567 | – |

Bold indicates  $p < 0.05$ .

37 **Supplementary Table S5.** Pairwise  $F_{ST}$  comparison between populations of *G. crinale*.

|                 | 1             | 2             | 3             | 4             | 5             | 6             | 7             | 8      | 9             | 10            | 11     | 12            | 13     | 14            | 15      | 16     | 17     | 18     | 19 |
|-----------------|---------------|---------------|---------------|---------------|---------------|---------------|---------------|--------|---------------|---------------|--------|---------------|--------|---------------|---------|--------|--------|--------|----|
| 1. France       | –             |               |               |               |               |               |               |        |               |               |        |               |        |               |         |        |        |        |    |
| 2. Spain        | <b>0.2667</b> |               |               |               |               |               |               |        |               |               |        |               |        |               |         |        |        |        |    |
| 3. UK           | 0.0000        | -0.7799       |               |               |               |               |               |        |               |               |        |               |        |               |         |        |        |        |    |
| 4. Italy        | <b>0.7515</b> | <b>0.6382</b> | 0.5152        |               |               |               |               |        |               |               |        |               |        |               |         |        |        |        |    |
| 5. Slovenia     | <b>0.6457</b> | 0.1948        | -0.7512       | 0.3008        |               |               |               |        |               |               |        |               |        |               |         |        |        |        |    |
| 6. USA          | <b>0.9098</b> | <b>0.7568</b> | 0.7005        | <b>0.5991</b> | <b>0.4662</b> |               |               |        |               |               |        |               |        |               |         |        |        |        |    |
| 7. Brazil       | <b>0.9119</b> | <b>0.8414</b> | <b>0.8499</b> | <b>0.7697</b> | <b>0.7583</b> | <b>0.6972</b> |               |        |               |               |        |               |        |               |         |        |        |        |    |
| 8. Puerto Rico  | 1.0000        | 0.8718        | 1.0000        | 0.4987        | 0.1260        | 0.7946        | 0.8958        |        |               |               |        |               |        |               |         |        |        |        |    |
| 9. Korea        | <b>0.9391</b> | <b>0.8847</b> | 0.8742        | <b>0.6303</b> | <b>0.7635</b> | <b>0.8930</b> | <b>0.9253</b> | 0.8741 |               |               |        |               |        |               |         |        |        |        |    |
| 10. China       | <b>0.9306</b> | <b>0.8361</b> | 0.7366        | <b>0.5712</b> | <b>0.6083</b> | <b>0.8329</b> | <b>0.9090</b> | 0.7164 | <b>0.6554</b> |               |        |               |        |               |         |        |        |        |    |
| 11. Japan       | 1.0000        | 0.9313        | 1.0000        | 0.5693        | 0.4849        | 0.8825        | 0.9412        | 1.0000 | 0.8067        | 0.1081        |        |               |        |               |         |        |        |        |    |
| 12. Hong Kong   | <b>1.0000</b> | <b>0.9290</b> | 1.0000        | <b>0.5229</b> | 0.6503        | <b>0.9047</b> | <b>0.9419</b> | 1.0000 | <b>0.6705</b> | <b>0.5586</b> | 1.0000 |               |        |               |         |        |        |        |    |
| 13. Singapore   | 1.0000        | 0.9371        | 1.0000        | 0.5658        | 0.5369        | 0.8707        | 0.9356        | 1.0000 | 0.8359        | 0.3324        | 1.0000 | 1.0000        |        |               |         |        |        |        |    |
| 14. Vietnam     | <b>1.0000</b> | <b>0.9626</b> | 1.0000        | <b>0.6985</b> | <b>0.8432</b> | <b>0.9362</b> | <b>0.9528</b> | 1.0000 | <b>0.8625</b> | <b>0.5541</b> | 0.0000 | <b>1.0000</b> | 1.0000 |               |         |        |        |        |    |
| 15. Australia   | <b>0.9303</b> | <b>0.8206</b> | 0.6910        | <b>0.5149</b> | <b>0.5458</b> | <b>0.8313</b> | <b>0.9093</b> | 0.6910 | <b>0.7742</b> | <b>0.6689</b> | 0.6972 | <b>0.6917</b> | 0.7276 | <b>0.8639</b> |         |        |        |        |    |
| 16. New Zealand | 1.0000        | 0.9040        | 1.0000        | 0.3884        | 0.3007        | 0.8742        | 0.9355        | 1.0000 | 0.8360        | 0.6681        | 1.0000 | 1.0000        | 1.0000 | 1.0000        | -0.5582 |        |        |        |    |
| 17. Tanzania    | 1.0000        | 0.9422        | 1.0000        | 0.6713        | 0.6053        | 0.9161        | 0.9568        | 1.0000 | 0.9069        | 0.7864        | 1.0000 | 1.0000        | 1.0000 | 1.0000        | 0.6129  | 1.0000 |        |        |    |
| 18. India       | 1.0000        | 0.9532        | 1.0000        | 0.7345        | 0.6714        | 0.9204        | 0.95805       | 1.0000 | 0.9264        | 0.8211        | 1.0000 | 1.0000        | 1.0000 | 1.0000        | 0.7813  | 1.0000 | 1.0000 |        |    |
| 19. Chile       | 1.0000        | 0.9370        | 1.0000        | 0.6383        | 0.5665        | 0.9081        | 0.9496        | 1.0000 | 0.8982        | 0.7806        | 1.0000 | 1.0000        | 1.0000 | 1.0000        | 0.6022  | 1.0000 | 1.0000 | 1.0000 | –  |

38 Bold indicates  $p < 0.05$ .

39
